# Supplementary material for: Functionalized graphene/C60nanohybrid for targeting photothermally enhanced photodynamic therapy
Source: Royal Society of Chemistry journal article supplement (doi:10.1039/c4ra13427c), 2014-11-25
Supplement: c4ra13427c1.pdf [file c4ra13427c1.pdf]

## Electronic Supplementary Information

### Functionalized graphene/C<sub>60</sub> nano hybrid for targeting photothermally enhanced photodynamic therapy

Zhen Hu<sup>a, b\*</sup>, Jun Li<sup>a</sup>, Yudong Huang<sup>a\*</sup>, Lei Chen<sup>a</sup>, Zhenhui Li<sup>a</sup>

<sup>a</sup> School of Chemical Engineering and Technology, State Key Laboratory of Urban Water Resource and Environment, Harbin Institute of Technology, Harbin 150001, China

<sup>b</sup> Department of Chemistry, Chemistry Research Laboratory, University of Oxford, Oxford. OX1 3TA, UK

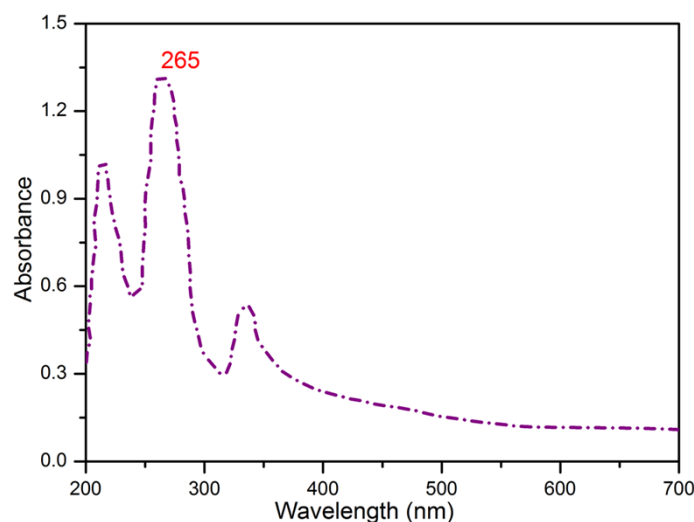

**Fig. S1** The UV-vis spectra of the C<sub>60</sub> in n-hexane.

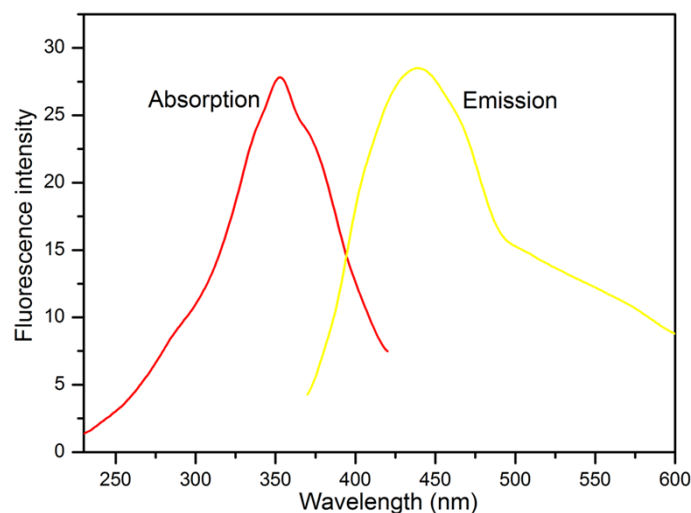

**Fig. S2** The fluorescence absorption and emission spectra of FA-GO-PEG/C<sub>60</sub>.

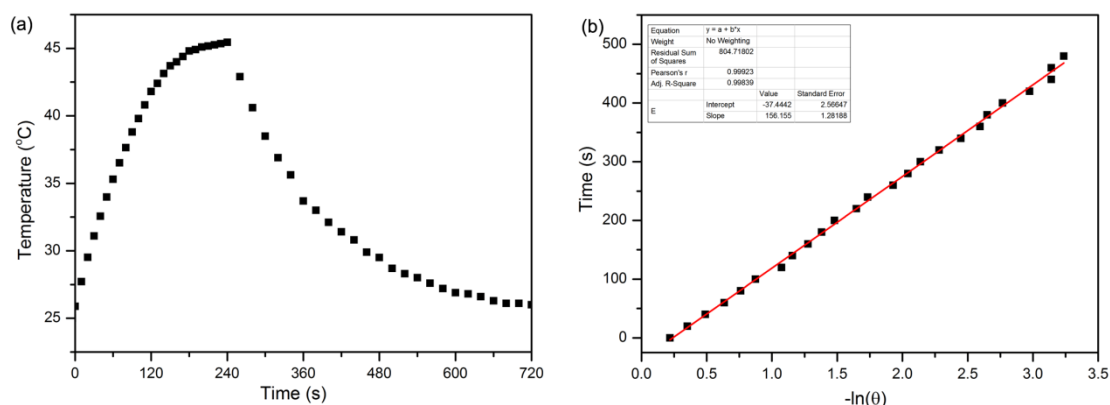

**Fig. S3** (a) Photothermal effect of the aqueous dispersion of the FA-GO-PEG/C<sub>60</sub> (10 µg/mL) irradiated with 808 laser (a power density of 2 W/cm<sup>2</sup>), in which the irradiation lasted for 240 s, and then the laser was shut off. (b) Linear time data versus  $-\ln(\theta)$  obtained from the cooling period of Fig. S3a. In order to get the hS, a dimensionless driving force temperature,  $\theta$  is introduced using the maximum system temperature,  $\theta = (T - T_{\text{surr}}) / (T_{\text{max}} - T_{\text{surr}})$ . Time constant for heat transfer from the system is determined to be  $\tau_s = 156$  s.

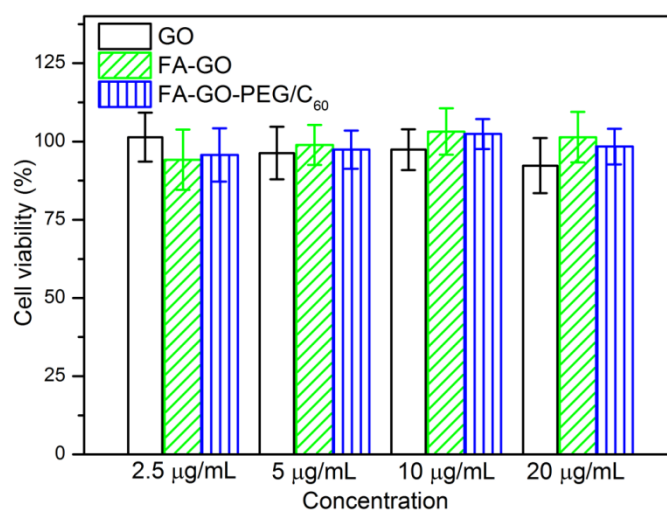

**Fig. S4** Cytotoxicity caused by GO, FA-GO and FA-GO-PEG/C<sub>60</sub> in dark. Cell viability was measured by the conventional MTT reduction assay. Data are presented as mean  $\pm$  S.D. (n=3).
